# Supplementary material
Source: PubMed Central journal article supplement (PMC10017368)
Supplement: NIHMS1837310-supplement-Supplemental_3.pdf [file NIHMS1837310-supplement-Supplemental_3.pdf]

**Supplement 3. Indications to use the dyspnea protocol in the ED**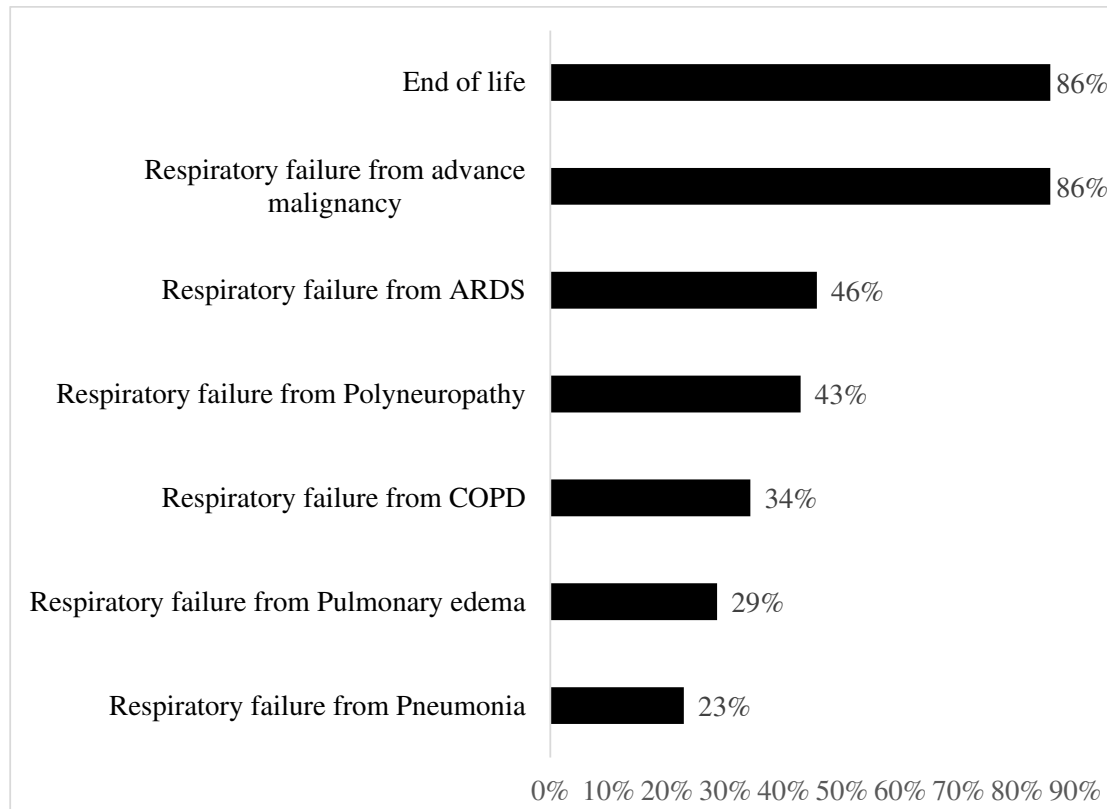

ED; Emergency Department, ARDS; Acute Respiratory Distress Syndromes, COPD; Chronic obstructive pulmonary disease
