# Supplementary material
Source: PubMed Central journal article supplement (PMC10017368)
Supplement: NIHMS1837310-supplement-Supplemental_file_1.pdf [file NIHMS1837310-supplement-Supplemental_file_1.pdf]

## Supplement 1. The palliative dyspnea Protocol

**NOTE:** These guidelines won't cover every clinical situation. Please page the DFCI/BWH Palliative Care service at #42200 with questions – we are happy to help!

Is the patient able to tolerate PO and/or experience **only mild to moderate** dyspnea?

Yes ↓

Order PO opioid PRN

No ↓

Order IV opioid PRN

### Choosing Initial Opioid Dose

#### Oral Medications

Onset: 30-60 mins, Duration: 4 hrs

NORMAL renal function

- MORPHINE solution 5-10mg PO q3h PRN
- Older patients: 2.5-5mg PO q4h PRN

ABNORMAL renal function (CrCl<50)

- HYDROMORPHONE solution/tablet 1-2mg PO q3h PRN
- Older patients: 0.5-1mg PO q4h PRN

#### IV Medications

Onset: 10-15 mins, Duration: 3-4 hrs  
(except Fentanyl)

NORMAL renal function

- MORPHINE 2-4mg IV Q2h PRN
- Older patients: 1-2mg IV Q2h PRN

ABNORMAL renal function (CrCl<50)

- HYDROMORPHONE 0.2-0.4mg IV Q2h PRN
- Older patients: IV hydromorphone 0.1-0.2mg Q2h PRN

IV FENTANYL: quick onset, short duration

- FENTANYL 25-50 mcg IV Q15 min PRN
- Older patients: IV FENTANYL 12.5-25 mcg Q15min PRN
- Onset of action = 1-3 minutes
- Duration = 1-2 hours

### Helpful Tips / Other Resources

- If uncontrolled dyspnea or pain:
  - Repeat PRN after 15 mins
  - Consider doubling PRN dose after that
- Remember to start a bowel regimen for all patients on opioids!
  - See Constipation section on previous page
- Other resources for pain/symptom management: [pinkbook.dfcu.org](http://pinkbook.dfcu.org) and [getfastfacts.org](http://getfastfacts.org)

### Converting Long-Acting Opioids to IV Infusions

#### Opioid Conversion Table

| Drug          | PO/PR (mg) | IV/SQ (mg)   |
|---------------|------------|--------------|
| Morphine      | 30         | 10           |
| Oxycodone     | 20         | N/A          |
| Hydromorphone | 7.5        | 1.5          |
| Fentanyl      | N/A        | 0.1 (100mcg) |

1. Calculate total long-acting opioid use in 24 hours
2. Convert to IV medication of choice based on conversion chart
3. Reduce dose by 25% if pain/dyspnea controlled, don't reduce if symptoms poorly controlled
4. Divide by 24 to reach hourly rate

E.g. Patient takes OxyContin 60mg BID.

120 mg daily oxycodone = 60mg IV morphine / 24 hours = 2.5mg/hour IV morphine. Can decrease by 25% depending on symptom severity.

### Managing Opioid Infusions for Dyspnea or Pain

To determine the **starting rate** of an **INFUSION**:

1. Add up the past 12-hour IV opioid requirement
2. Divide by 12 to reach hourly rate

E.g. Patient received 24mg IV morphine in 12 hours.  
Starting infusion rate would be 2mg/hr.

**ALWAYS USE PRN BOLUSES FOR ACUTE SYMPTOMS**

PRN bolus can be increased up to q15min PRN  
(or q10 min for Fentanyl)

PRN bolus dose = Range from drip rate to 2x the drip rate

E.g. Patient is on Morphine 2mg/hr.  
PRN bolus would be 2-4mg Q1H PRN hours PRN

**Increase infusion rate if requiring >3 PRN doses in 6 hours:**

1. Add up PRN doses and divide by # hours given
2. Add this to current infusion rate
3. Continue to use boluses PRN

E.g. Patient is on Morphine IV 2mg/hr and receives 12mg in PRN's over 4 hours. This is an additional 3mg/hr; rate should increase from 2 to 5mg/hr.
