# Supplementary material
Source: PubMed Central journal article supplement (PMC10017368)
Supplement: NIHMS1837310-supplement-Supplemental_file_2.pdf [file NIHMS1837310-supplement-Supplemental_file_2.pdf]

**Supplement 2. The demographic characteristics of the emergency clinicians and their reported acceptability of the palliative dyspnea protocol.**

| Clinician demographic       | Frequency   | Neutral*    | Somewhat Helpful* | Very Helpful* | P-value |
|-----------------------------|-------------|-------------|-------------------|---------------|---------|
|                             | N=35<br>(%) | n=20<br>(%) | n=9<br>(%)        | n=6<br>(%)    |         |
| Role                        |             |             |                   |               | 0.692   |
| Attending physician         | 14 (40.0)   | 10 (50.0)   | 2 (22.2)          | 2 (33.3)      |         |
| Resident physician          | 11 (31.4)   | 5 (25.0)    | 4 (44.4)          | 2 (33.3)      |         |
| Physician assistant         | 10 (28.6)   | 5 (25.0)    | 3 (33.3)          | 2 (33.3)      |         |
| Year of clinical experience |             |             |                   |               | 0.501   |
| 1-5                         | 19 (54.3)   | 9 (45.0)    | 7 (77.8)          | 3 (50.0)      |         |
| 6-10                        | 5 (14.3)    | 4 (20.0)    | 0                 | 1 (16.7)      |         |
| >10                         | 11 (31.4)   | 7 (35.0)    | 2 (22.2)          | 2 (33.3)      |         |
| Age (year)                  |             |             |                   |               | 0.647   |
| 20-29                       | 6 (17.1)    | 2 (10.0)    | 3 (33.3)          | 1 (16.7)      |         |
| 30-39                       | 17 (48.6)   | 11 (55.0)   | 4 (44.4)          | 2 (33.3)      |         |
| 40-49                       | 8 (22.9)    | 4 (20.0)    | 2 (22.2)          | 2 (33.3)      |         |
| >49                         | 4 (11.4)    | 3 (15.0)    | 0                 | 1 (16.7)      |         |
| Gender                      |             |             |                   |               | 0.587   |
| Male                        | 14 (40.0)   | 7 (35.0)    | 5 (55.6)          | 2 (33.3)      |         |
| Female                      | 19 (54.3)   | 12 (60.0)   | 4 (44.4)          | 3 (50.0)      |         |
| Decline to answer           | 2 (5.7)     | 1 (5.0)     | 0                 | 1 (16.7)      |         |

\*No participant rated 'somewhat unhelpful' and 'very unhelpful'
