# Supplementary material
Source: PubMed Central journal article supplement (PMC10017368)
Supplement: NIHMS1837310-supplement-Supplemental_file_4.pdf [file NIHMS1837310-supplement-Supplemental_file_4.pdf]

#### Supplement 4. Suggestion for protocol improvement

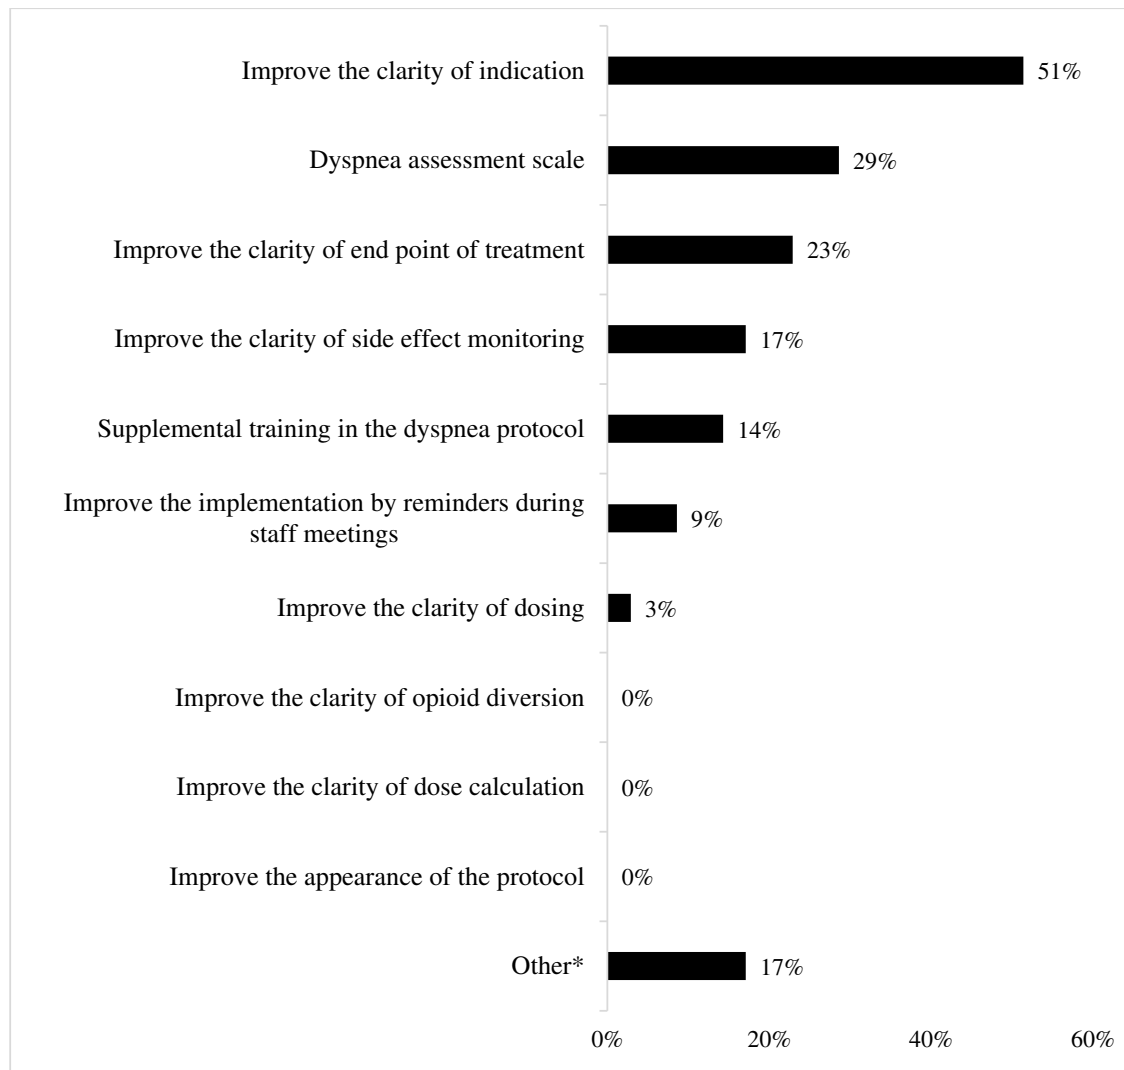

\* Other suggestions from emergency clinicians included improving the implementation, accessibility, correlation to the patient's code status, and removing the word "Palliative" from the protocol due to clinician bias.
