# Supplementary material
Source: PubMed Central journal article supplement (PMC10017368)

**Supplement 5. The Respiratory Distress Observation Scale (RDOS) at Triage and the two-to-four-hour follow-up of patients with dyspnea in the Emergency Department were compared among patients who used or did not use the palliative dyspnea protocol.**

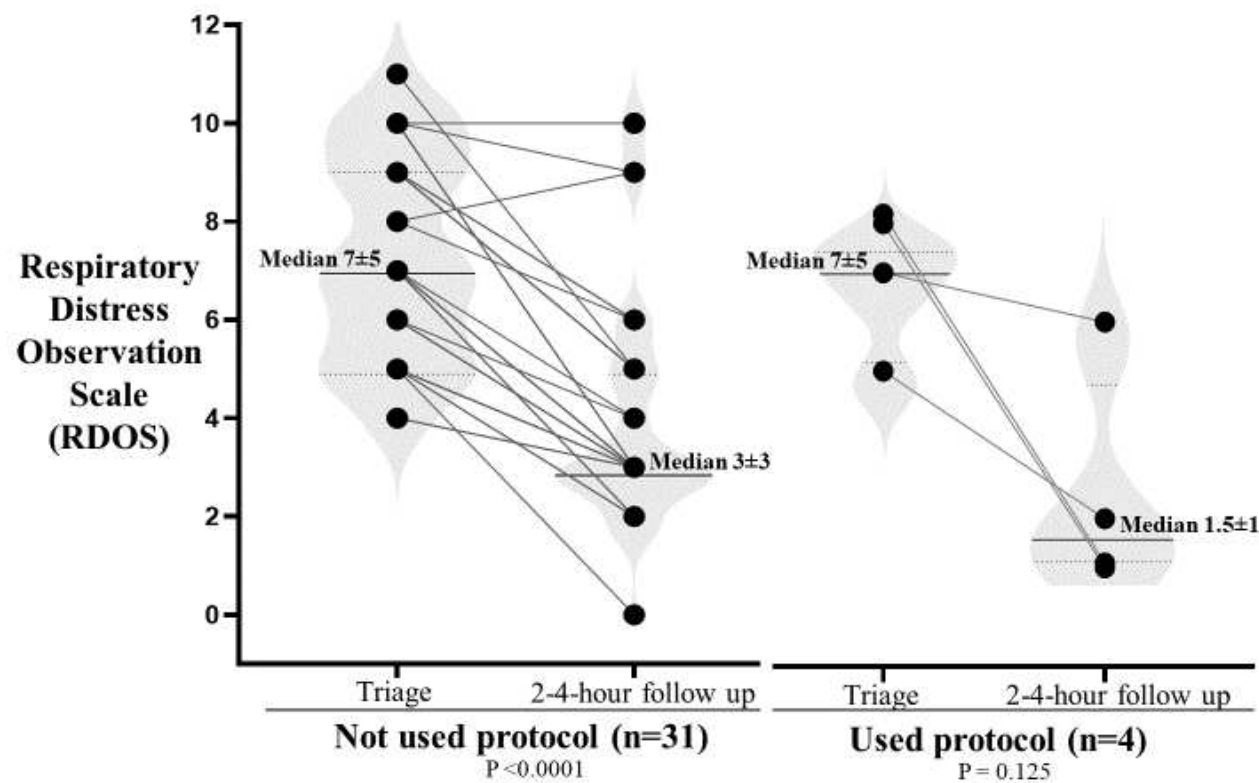

Supplement: NIHMS1837310-supplement-Supplemental_file_5.pdf [file NIHMS1837310-supplement-Supplemental_file_5.pdf]
