# Supplementary material
Source: PubMed Central journal article supplement (PMC10017368)
Supplement: NIHMS1837310-supplement-Supplemental_file_6.pdf [file NIHMS1837310-supplement-Supplemental_file_6.pdf]

## Supplement 6. The clinicians and patients' factors associated with the use of the palliative dyspnea protocol

|                                 | Total<br>N=35 (%) | No protocol used<br>n=31 (%) | Protocol used<br>n=4 (%) |
|---------------------------------|-------------------|------------------------------|--------------------------|
| <b>CLINICIAN</b>                |                   |                              |                          |
| Role                            |                   |                              |                          |
| Attending physician             | 14 (40.0)         | 13 (41.9)                    | 1 (25.0)                 |
| Resident physician              | 11 (31.4)         | 9 (29.0)                     | 2 (50.0)                 |
| Physician assistant             | 10 (28.6)         | 9 (29.0)                     | 1 (25.0)                 |
| Previous seen the protocol      | 6 (17.1)          | 5 (16.1)                     | 1 (25.0)                 |
| Year of clinical experience     |                   |                              |                          |
| 1-5                             | 19 (54.3)         | 17 (54.8)                    | 2 (50.0)                 |
| 6-10                            | 5 (14.3)          | 4 (12.9)                     | 1 (25.0)                 |
| >11                             | 11 (31.4)         | 10 (32.3)                    | 1 (25.0)                 |
| <b>PATIENT</b>                  |                   |                              |                          |
| Comorbidity                     |                   |                              |                          |
| Advanced malignancy             | 6 (17.1)          | 4 (12.9)                     | 2 (50.0)                 |
| Chronic lung                    | 10 (28.6)         | 10 (32.3)                    | 0                        |
| Chronic heart                   | 9 (25.7)          | 7 (22.6)                     | 2 (50.0)                 |
| Chronic kidney                  | 3 (8.6)           | 3 (9.7)                      | 0                        |
| Elderly $\geq 65$               | 16 (45.7)         | 16 (45.7)                    | 0                        |
| Current opioid use              | 7 (20.0)          | 6 (19.4)                     | 1 (25.0)                 |
| Code status                     |                   |                              |                          |
| Full                            | 27 (77.1)         | 23 (74.2)                    | 4 (100.0)                |
| Do-not-resuscitate but intubate | 3 (8.6)           | 3 (9.7)                      | 0                        |
| Do-not-resuscitate or intubate  | 3 (8.6)           | 3 (9.7)                      | 0                        |
| Comfort                         | 2 (5.7)           | 2 (6.5)                      | 0                        |
| Decision maker                  |                   |                              |                          |
| Patient                         | 30 (85.7)         | 26 (83.9)                    | 4 (100.0)                |
| family                          | 5 (14.3)          | 5 (16.1)                     | 0                        |
| Triage information              |                   |                              |                          |
| Respiratory rate 22-29          | 17 (48.6)         | 14 (45.2)                    | 3 (75.0)                 |
| Respiratory rate $\geq 30$      | 18 (51.4)         | 17 (54.8)                    | 1 (25.0)                 |
| Heart rate <110                 | 13 (37.1)         | 11 (35.5)                    | 2 (50.0)                 |
| Heart rate $\geq 110$           | 22 (62.9)         | 20 (64.5)                    | 2 (50.0)                 |
| Oxygen saturation $\geq 94\%$   | 18 (51.4)         | 14 (45.2)                    | 4 (100.0)                |
| Oxygen saturation <94%          | 17 (48.6)         | 17 (54.8)                    | 0                        |
| Initial diagnosis of dyspnea    |                   |                              |                          |
| Heart failure, volume overload  | 7 (20.0)          | 5 (16.1)                     | 2 (50.0)                 |
| Pneumonia                       | 9 (25.7)          | 8 (25.8)                     | 1 (25.0)                 |
| COPD exacerbation               | 6 (17.1)          | 6 (19.4)                     | 0                        |
| Sepsis                          | 5 (14.3)          | 5 (16.1)                     | 0                        |
| Asthma                          | 2 (5.7)           | 2 (6.5)                      | 0                        |
| Malignancy                      | 3 (8.6)           | 2 (6.5)                      | 1 (25.0)                 |
| <b>TREATMENT</b>                |                   |                              |                          |
| Nasal cannula                   | 31 (88.6)         | 27 (87.1)                    | 4 (100.0)                |
| Mask with bag                   | 8 (22.9)          | 8 (25.8)                     | 0                        |
| Nebulizer                       | 14 (40.0)         | 14 (45.2)                    | 0                        |
| Non-invasive positive pressure  | 8 (22.9)          | 8 (25.8)                     | 0                        |
| High flow nasal cannula         | 2 (5.7)           | 2 (6.5)                      | 0                        |
